# Supplementary material for: Novel Ag/Au/Pt trimetallic nanocages used with surface-enhanced Raman scattering for trace fluorescent dye detection
Source: Royal Society of Chemistry journal article supplement (doi:10.1039/c4tb00569d), 2014-01-01
Supplement: c4tb00569d1.pdf [file c4tb00569d1.pdf]

## **Novel Ag/Au/Pt trimetallic nanocages used with surface-enhanced Raman scattering for trace fluorescent dye detection**

Tran Thi Bich Quyen<sup>a</sup>, Wei-Nien Su<sup>b,\*</sup>, John Rick<sup>a</sup>, Jyong-Yue Liu<sup>a</sup>, Bing-Joe Hwang<sup>a,c,\*</sup>

<sup>a</sup>Nanoelectrochemistry Laboratory, Department of Chemical Engineering, National Taiwan University of Science and Technology, Taipei 106, Taiwan

<sup>b</sup>Graduate Institute of Applied Science and Technology, National Taiwan University of Science and Technology, Taipei 106, Taiwan

<sup>c</sup>National Synchrotron Radiation Research Center, Hsinchu 30076, Taiwan

**\*Corresponding Authors:** (1) Bing-Joe Hwang: E-mail:bjh@mail.ntust.edu.tw and (2) Wei-Nien Su: E-mail: wsu@mail.ntust.edu.tw

## Supporting Information

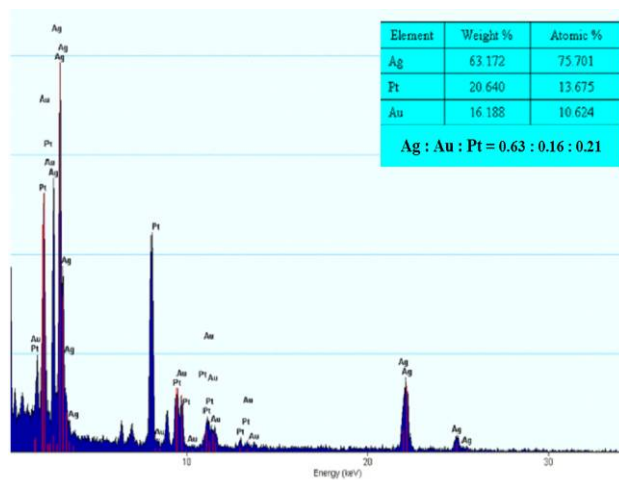

**Fig. S1.** EDX spectrum of Ag/Au/Pt NCs at wt% ratio of Ag:Au:Pt = 0.63:0.16:0.21
